# Supplementary material for: Hip strengthening exercise dosage is not associated with clinical improvements after total hip arthroplasty – a prospective cohort study (the PHETHAS-1 study)
Source: bioRxiv or medRxiv preprint supplement (doi:10.1101/2023.07.12.23292442), 2023-07-13
Supplement: Supplementary file [file media-3.pdf]

## Appendix C – Supplementary results on secondary and exploratory analyses

Appendix to: *Hip strengthening exercise dosage is not associated with clinical improvements after total hip arthroplasty – a prospective cohort study (the PHETHAS-1 study)*

### Secondary analysis

**Figure C1.** Box plots of the 3 (baseline) to 10-week (follow-up) median change in symptoms measured by HOOS, for quartile groups of performed number of repetitions per week (exercise dosages).

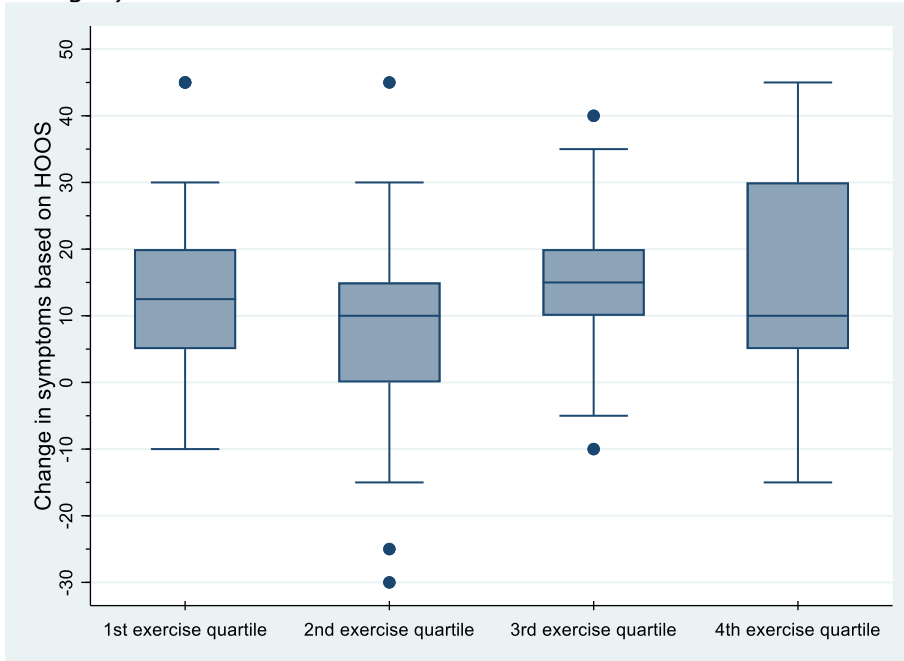

**Figure C2.** Box plots of the 3 (baseline) to 10-week (follow-up) median change in quality of life measured by HOOS, for quartile groups of performed number of repetitions per week (exercise dosages)

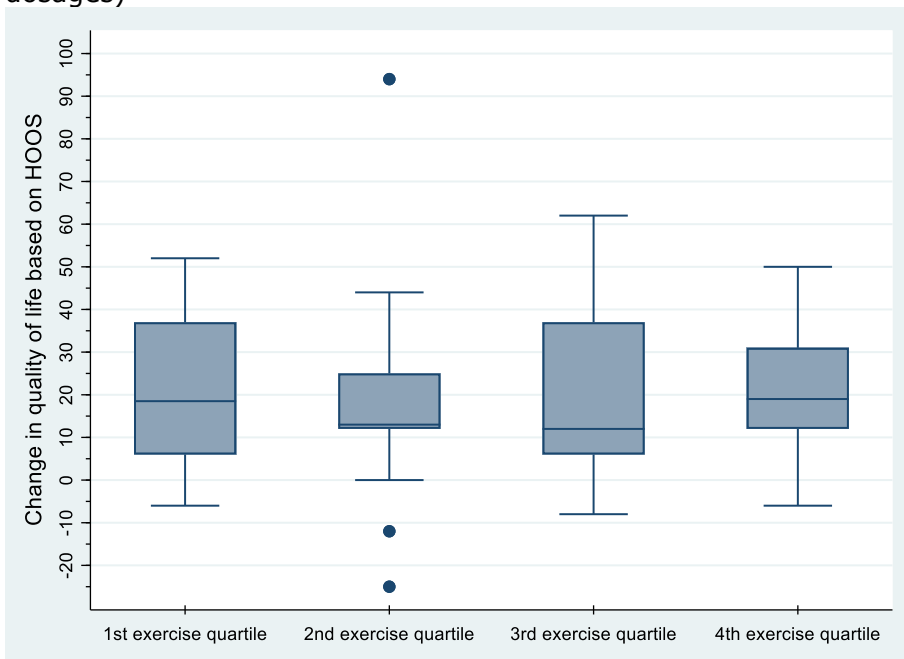

## Appendix C – Supplementary results on secondary and exploratory analyses

Appendix to: *Hip strengthening exercise dosage is not associated with clinical improvements after total hip arthroplasty – a prospective cohort study (the PHETHAS-1 study)*

**Figure C3.** Box plots of the 3 (baseline) to 10-week (follow-up) median change in isometric hip abduction strength (Nm/kg), for quartile groups of performed number of repetitions per week (exercise dosages).

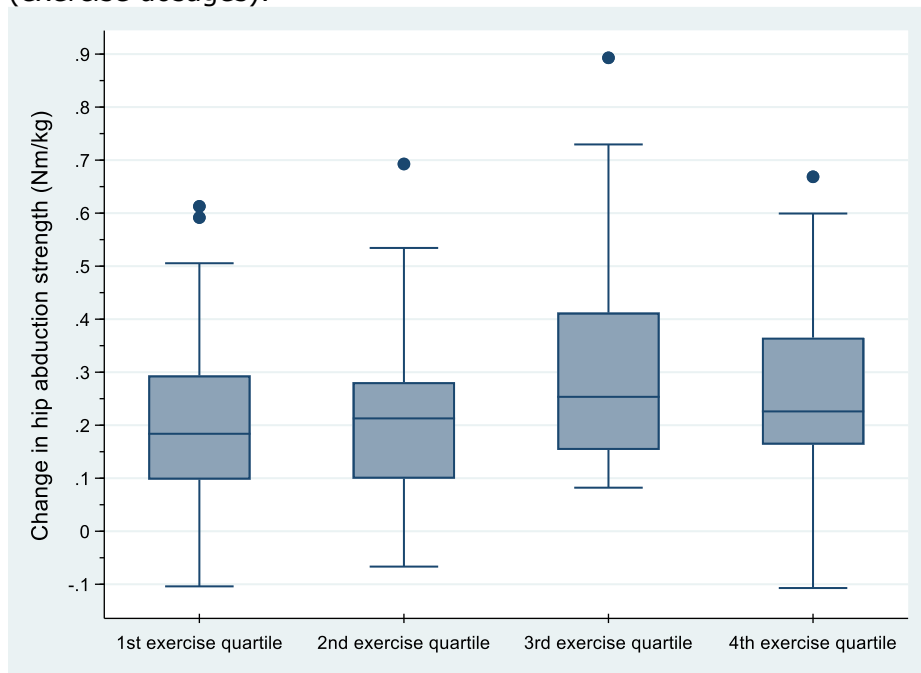

**Figure C4.** Box plots of the 3 (baseline) to 10-week (follow-up) median change in isometric hip flexion strength, for quartile groups of performed number of repetitions per week (exercise dosages).

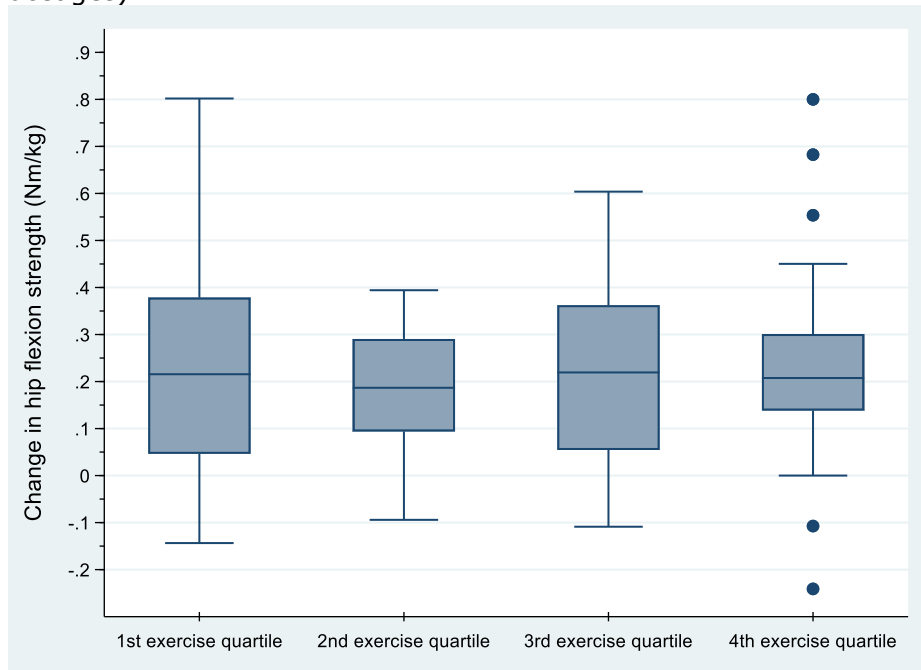

## Appendix C – Supplementary results on secondary and exploratory analyses

Appendix to: *Hip strengthening exercise dosage is not associated with clinical improvements after total hip arthroplasty – a prospective cohort study (the PHETHAS-1 study)*

**Table C1.** Change in outcomes from baseline (3 weeks after surgery) to follow-up (10 weeks after surgery) distributed on quartiles of performed exercise dose.

|                                                              | 1st exercise quartile<br>(28-208<br>reps/week)<br>n=22 | 2nd exercise quartile<br>(209-338<br>reps/week)<br>n=23 | 3rd exercise quartile<br>(339-548<br>reps/week)<br>n=23 | 4th exercise quartile<br>(549-1812<br>reps/week)<br>n=23 |
|--------------------------------------------------------------|--------------------------------------------------------|---------------------------------------------------------|---------------------------------------------------------|----------------------------------------------------------|
| <b>Gait speed,</b><br>m/sec<br><i>mean (95% CI)</i>          | 0.26<br>(0.18; 0.33)                                   | 0.32<br>(0.25; 0.39)                                    | 0.37<br>(0.28; 0.47)                                    | 0.37<br>(0.30; 0.45)                                     |
| <b>HOOS_adl</b><br><i>mean (95% CI)</i>                      | 13 (8; 19)                                             | 10 (5; 15)                                              | 16 (11; 21)                                             | 16 (10; 22)                                              |
| <b>HOOS_pain</b><br><i>mean (95% CI)</i>                     | 14 (8; 19)                                             | 10 (4; 15)*                                             | 16 (9; 22)                                              | 14 (8; 20)                                               |
| <b>HOOS_sym</b><br><i>mean (95% CI)</i>                      | 14 (7; 20)                                             | 6 (-1; 14)*                                             | 15 (10; 20)                                             | 14 (8; 21)                                               |
| <b>HOOS_qol</b><br><i>mean (95% CI)</i>                      | 19 (11; 27)                                            | 18 (8; 29)†                                             | 20 (12;28)                                              | 23 (17; 29)                                              |
| <b>30s chair-stand</b><br><i>mean (95% CI)</i>               | 3.9 (2.0; 5.8) §                                       | 4.6 (2.6; 6.5) §                                        | 6.0 (4.4; 7.5)                                          | 5.0 (3.8; 6.1)‡                                          |
| <b>Hip abduction strength,</b> Nm/kg<br><i>mean (95% CI)</i> | 0.22<br>(0.13; 0.30)                                   | 0.22<br>(0.13; 0.30)‡                                   | 0.32<br>(0.23; 0.41)                                    | 0.26<br>(0.18; 0.33)                                     |
| <b>Hip flexion strength,</b> Nm/kg<br><i>mean (95% CI)</i>   | 0.24<br>(0.14; 0.34)                                   | 0.18<br>(0.12; 0.24)*                                   | 0.22<br>(0.14; 0.31)*                                   | 0.24<br>(0.14; 0.34)                                     |

\* n=22, † n=21, ‡ n=20, § n=18

**Table C2.** Association between gait speed at 10 weeks follow up and the independent variables: performed exercise dose (mean number of repetitions/week), self-efficacy at baseline, 24-hour physical activity (Mean upright time/day and mean number of steps/day), and gait speed at baseline. The association is presented as relative increase.

| <b>Independent variables</b>                  | <b>Coefficient (95% CI)</b> |
|-----------------------------------------------|-----------------------------|
| Mean number of repetitions/week (in hundreds) | 1.007 (0.998; 1.017)        |
| Self-efficacy at baseline                     | 1.048 ( 0.995; 1.104)       |
| Mean upright time/day                         | 0.981 (0.964; 0.998)        |
| Mean number of steps/day                      | 1.000 (1.000; 1.000)        |
| Gait speed at baseline                        | 1.005 (1.004; 1.005)        |

## Appendix C – Supplementary results on secondary and exploratory analyses

Appendix to: *Hip strengthening exercise dosage is not associated with clinical improvements after total hip arthroplasty – a prospective cohort study (the PHETHAS-1 study)*

### Exploratory analyses

#### Factors associated with exercise dose

Based on the statistical approach thoroughly described in Appendix A, the association is tested differently among the independent variables.

For HOOS\_pain at 3 weeks and Self-efficacy at 3 weeks, the association could be presented as a polynomial equation along with presentation of a graphical prediction line. To show further details on distribution of data, analyses based on quartiles – along with Kruskal-Wallis test – is also presented.

**Table C3.**

Factors associated with exercise dose in terms of repetitions per week and exercise days per week.

| Dependent variable                                 | Repetitions per week                                           |          | Exercise days per week                                         |        |
|----------------------------------------------------|----------------------------------------------------------------|----------|----------------------------------------------------------------|--------|
| Independent variable                               | Median (1st-3rd quartile)<br>p-values (Kruskall-Wallis test) * |          | Median (1st-3rd quartile)<br>p-values (Kruskall-Wallis test) * |        |
| <b>Number of pain flares (week 0-2), n=91</b>      |                                                                |          |                                                                |        |
| - No pain flares, n=73†                            | 339 (208-561)                                                  | p=0.82   | 2.7 (2-3.2)                                                    | p=0.97 |
| - One pain flare, n=11                             | 462 (246-521)                                                  |          | 3 (2.0-3.2)                                                    |        |
| - Two or more pain flares, n=7                     | 257 (144-500)                                                  |          | 2.6 (1.4-3.3)                                                  |        |
| - No pain flares, n=73†                            | 339 (208-561)                                                  | p=0.76   | 2.7 (2-3.2)                                                    | p=0.83 |
| - At least one pain flare, n=18                    | 383.5 (246-500)                                                |          | 2.8 (2.0-3.2)                                                  |        |
| <b>Number of pain flares (entire period), n=91</b> |                                                                |          |                                                                |        |
| - No pain flares, n=71†                            | 370 (182-572)                                                  | p=0.66   | 2.7 (2-3.2)                                                    | p=0.85 |
| - One pain flare, n=10                             | 391 (302-521)                                                  |          | 3.0 (2.0-3.2)                                                  |        |
| - Two or more pain flares, n=10                    | 254.5 (209-470)                                                |          | 2.6 (2.4-3.2)                                                  |        |
| - No pain flares, n=71†                            | 370 (182-572)                                                  | p=0.59   | 2.7 (2-3.2)                                                    | p=0.78 |
| - At least one pain flare, n=20                    | 312.5 (234-485)                                                |          | 2.9 (2.2-3.2)                                                  |        |
| <b>HOOS_pain at 3 week, n=90†</b>                  | Association is visualized in Figure 12                         | p=0.11‡  |                                                                |        |
| - 1st quartile (40-65), n=26†                      |                                                                |          | 2.6 (2.0-3.1)                                                  |        |
| - 2nd quartile (68-75), n=21                       |                                                                |          | 3.1 (2.4-3.3)                                                  |        |
| - 3rd quartile (78-88), n=21                       |                                                                |          | 2.8 (2.2-3.4)                                                  | p=0.43 |
| - 4th quartile (90-100), n=22                      |                                                                |          | 2.7 (1.6-3.1)                                                  |        |
| <b>Self-efficacy at 3 week, n=75</b>               | Association is visualized in Figure 13                         | p= 0.38§ |                                                                |        |
| - 1st quartile (1-2.9), n=18                       |                                                                |          | 3.1 (2-3.3)                                                    |        |
| - 2nd quartile (3-3.4), n=24                       |                                                                |          | 2.8 (2.2-3.4)                                                  |        |
| - 3rd quartile (3.5-3.8), n=24†                    |                                                                |          | 2.6 (2.0-3.1)                                                  | p=0.28 |
| - 4th quartile (3.9-4), n=19                       |                                                                |          | 2.6 (1.7-3)                                                    |        |
| <b>Motivation to perform exercises</b>             |                                                                |          |                                                                |        |
| - Very much, n=78†                                 | 373 (212-550)                                                  |          | 2.8 (2.1-3.2)                                                  |        |
| - To some degree, n=11                             | 305 (144-492)                                                  | p=0.31   | 2.7 (1.4-3.3)                                                  |        |
| - A little, n=1                                    | 99 (99-99)                                                     |          | 0.3 (0.3-0.3)                                                  | p=0.23 |

## Appendix C – Supplementary results on secondary and exploratory analyses

Appendix to: *Hip strengthening exercise dosage is not associated with clinical improvements after total hip arthroplasty – a prospective cohort study (the PHETHAS-1 study)*

|                                                                                                                                                                                        |                                                                               |        |                                                                                 |        |
|----------------------------------------------------------------------------------------------------------------------------------------------------------------------------------------|-------------------------------------------------------------------------------|--------|---------------------------------------------------------------------------------|--------|
| - Not at all, n=0<br>- Don't know, n=0                                                                                                                                                 | NA<br>NA                                                                      |        | NA<br>NA                                                                        |        |
| - Very much, n=78 <sup>†</sup><br>- Less than very much, n=12                                                                                                                          | 373 (212-550)<br>275.5 (121.5-477.5)                                          | p=0.28 | 2.8 (2.1-3.2)<br>2.7 (1.3-3.2)                                                  | p=0.64 |
| <b>Belief in effect of exercises</b><br>- Very much, n=85 <sup>†</sup><br>- To some degree, n=5<br>- A little, n=0<br>- Not at all, n=0<br>- Don't know, n=0                           | 376 (209-549)<br>257 (222-305)<br>NA<br>NA<br>NA                              | p=0.40 | 2.8 (2.0-3.2)<br>2.7 (2.6-3.1)<br>NA<br>NA<br>NA                                | p=0.98 |
| <b>Self-belief in compliance to exercise</b><br>- Very certain, n=49<br>- Almost certain, n=40 <sup>†</sup><br>- A little uncertain, n=1<br>- Very uncertain, n=0<br>- Don't know, n=0 | 418 (175-550)<br>323 (222-510.5)<br>222 (222-222)<br>NA<br>NA                 | p=0.72 | 2.9 (2.1-3.2)<br>2.6 (2-3.2)<br>2.7 (2.7-2.7)<br>NA<br>NA                       | p=0.71 |
| - Very certain, n=49<br>- Less than very certain, n=41 <sup>†</sup>                                                                                                                    | 418 (175-550)<br>308 (222-500)                                                | p=0.69 | 2.9 (2.1-3.2)<br>2.6 (2-3.2)                                                    | p=0.41 |
| <b>Satisfaction with rehabilitation exercises</b><br>- Very satisfied, n=63<br>- Satisfied, n=21<br>- Unsatisfied, n=3 <sup>‡</sup><br>- Very unsatisfied, n=1<br>- Don't know, n=1    | 418 (208-589)<br>320 (222-539)<br>214 (52-252)<br>246 (246-246)<br>68 (68-68) | p=0.19 | 2.8 (2.1-3.2)<br>3 (2.1-3.4)<br>1.9 (0.9-2.3)<br>2.0 (2.0-2.0)<br>0.6 (0.6-0.6) | p=0.11 |
| - Satisfied or very satisfied, n=84<br>- Unsatisfied or very unsatisfied, n=4 <sup>‡</sup>                                                                                             | 230 (133-249)<br>379.5 (210.5-555.5)                                          | p=0.07 | 2.8 (2.1-3.2)<br>2.0 (1.5-2.3)                                                  | p=0.03 |
| <b>Upright time per day (hours), n=78</b>                                                                                                                                              | 44 (3; 84), p=0.04                                                            |        |                                                                                 |        |
| - 1st quartile (2.58-4.39), n=20<br>- 2nd quartile (4.41-5.6), n=20<br>- 3rd quartile (5.69-6.56), n=20<br>- 4th quartile (6.58-9.34), n=19                                            |                                                                               |        | 2.8 (2.0-3.2)<br>2.6 (2.1-3.1)<br>2.5 (1.6-3.3)<br>2.9 (2.3-3.2)                | p=0.78 |
| <b>Steps per day (in 1000), n=78</b>                                                                                                                                                   | 36 (13; 58), p=0.003                                                          |        |                                                                                 |        |
| - 1st quartile (1748-4744), n=20<br>- 2nd quartile (4887-6019), n=20<br>- 3rd quartile (6346-8239), n=20<br>- 4th quartile (8907-14188), n=19                                          |                                                                               |        | 2.7 (2.3-3.1)<br>2.3 (1.8-3)<br>2.8 (1.9-3.1)<br>3.1 (2.3-3.4)                  | p=0.28 |

\* unless otherwise stated

† plus one extra observation in analysis of association between exercise days and independent variable

‡ a non-linear regression model (third-grade polynomial) was used.

§ a non-linear regression model (fourth-grade polynomial) was used.

|| A linear regression model was used

**Appendix C – Supplementary results on secondary and exploratory analyses**

Appendix to: *Hip strengthening exercise dosage is not associated with clinical improvements after total hip arthroplasty – a prospective cohort study (the PHETHAS-1 study)*

**Figure C5.** Association between HOOS\_pain at baseline and performed number of repetitions per week.

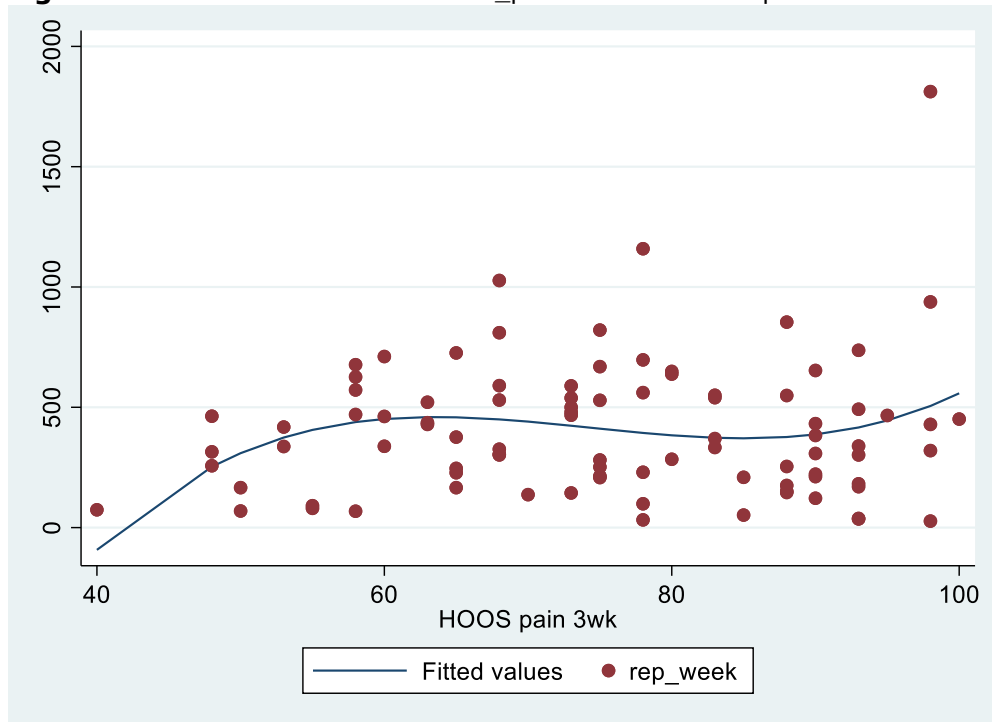

**Figure C6.** Association between mean self-efficacy at baseline and performed number of repetitions per week.

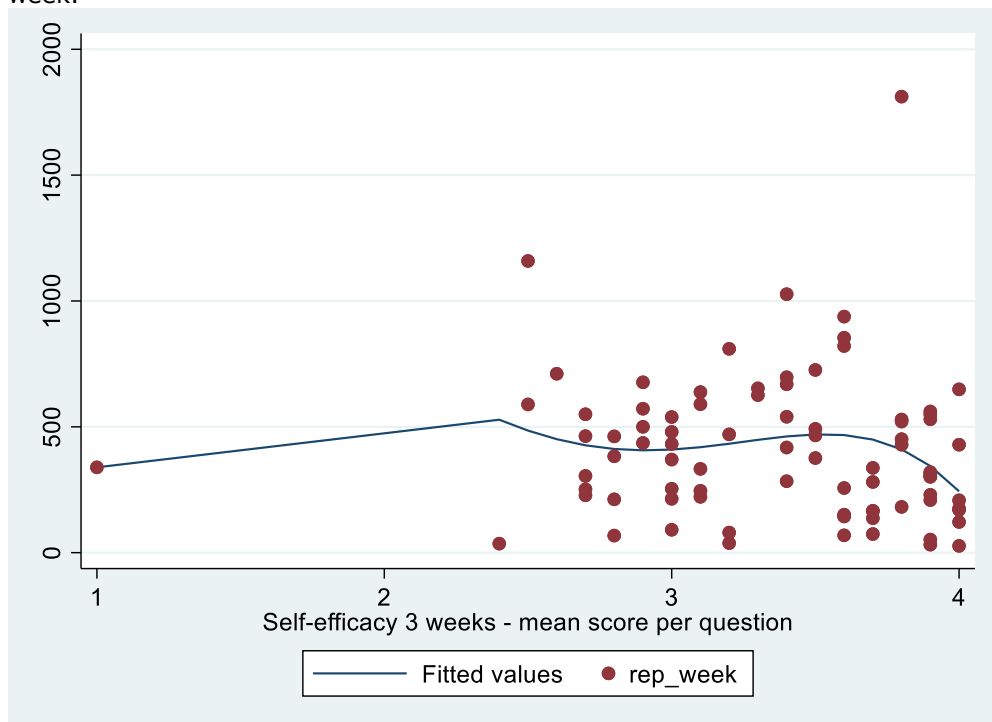

## Appendix C – Supplementary results on secondary and exploratory analyses

Appendix to: *Hip strengthening exercise dosage is not associated with clinical improvements after total hip arthroplasty – a prospective cohort study (the PHETHAS-1 study)*

### Factors associated with physical activity

**Table C4.** Factors associated with physical activity in terms of upright time per day and steps per day. Association is determined by univariate linear regression models

| Independent variable \ Dependent variable                                   | Upright time/day (hours) | Step/day (numbers) |
|-----------------------------------------------------------------------------|--------------------------|--------------------|
| Number of pain flares (week 0-2), n=81                                      | -0.14 (-0.55; 0.26)      | -118 (-828; 592)   |
| HOOS_pain at 3 week, n=80                                                   | -0.01 (-0.03; 0.01)      | -41 (-80; -2)*     |
| Self-efficacy at 3 week, n=75                                               | -0.30 (-0.98; 0.38)      | 617 (-595; 1829)   |
| Motivation to perform exercises                                             | <i>Reference</i>         | <i>Reference</i>   |
| - Very much, n=70                                                           | -0.55 (-1.64; 0.53)      | -763 (-2695; 1169) |
| - To some degree, n=9                                                       | -2.37 (-5.45; 0.71)      | 164 (-5330; 5658)  |
| - A little, n=1                                                             | NA                       | NA                 |
| - Not at all, n=0                                                           | NA                       | NA                 |
| - Don't know, n=0                                                           | -0.73 (-1.77; 0.30)      | -670 (-2503; 1163) |
| Very much versus lesser degree of motivation (very much is reference value) |                          |                    |
| Self-belief in compliance to exercising                                     | <i>Reference</i>         | <i>Reference</i>   |
| - Very certain, n=43                                                        | 0.37 (-0.32; 1.06)       | -525 (-1739; 690)  |
| - Almost certain, n=37                                                      | NA                       | NA                 |
| - A little uncertain, n=0                                                   | NA                       | NA                 |
| - Very uncertain, n=0                                                       | NA                       | NA                 |
| - Don't know, n=0                                                           | NA                       | NA                 |

\*p=0.04

### Patient-perceived change in hip symptoms and MCII

**Table C5.** Change from baseline(3 weeks) to 10-week follow-up in gait speed, HOOS\_adl, HOOS\_symp, HOOS\_pain and HOOS\_qol, distributed on level of patient-perceived change in hip symptoms

|                             | Change in HOOS_adl<br>mean<br>(95% CI) | Change in HOOS_pain<br>mean<br>(95% CI) | Change in HOOS_symp<br>mean<br>(95% CI) | Change in HOOS_qol<br>mean<br>(95% CI) | Change in gait speed (m/sec)<br>median<br>[1st-3rd quartile] |
|-----------------------------|----------------------------------------|-----------------------------------------|-----------------------------------------|----------------------------------------|--------------------------------------------------------------|
| <b>Much better,</b><br>n=77 | 14<br>(11; 17)*                        | 14<br>(11; 17)                          | 14<br>(11; 16)                          | 22<br>(19; 27)*                        | 0.32<br>[0.21-0.42]†                                         |
| <b>A little better,</b> n=6 | 15<br>(-5; 36)                         | 13<br>(-5; 30)                          | 18<br>(-6; 41)                          | 10<br>(-4; 24)                         | 0.36<br>[0.30-0.41]                                          |
| <b>About the same,</b> n=4  | 9<br>(-12; 30)                         | -4<br>(-23; 15)                         | -4<br>(-32; 25)                         | 3<br>(-31; 37)                         | 0.20<br>[0.18-0.23]                                          |
| <b>A little worse,</b> n=1  | 6<br>(NA)                              | 12<br>(NA)                              | -25<br>(NA)                             | 0<br>(NA)                              | 0.36<br>[NA]                                                 |
| <b>Much worse,</b> n=0      | NA                                     | NA                                      | NA                                      | NA                                     | NA                                                           |

\* n=76, † n=78

**Appendix C – Supplementary results on secondary and exploratory analyses**

Appendix to: *Hip strengthening exercise dosage is not associated with clinical improvements after total hip arthroplasty – a prospective cohort study (the PHETHAS-1 study)*

**Figure C7.** Distribution of level of patient-perceived change in hip symptoms presented for each quartile of performed number of repetitions per week

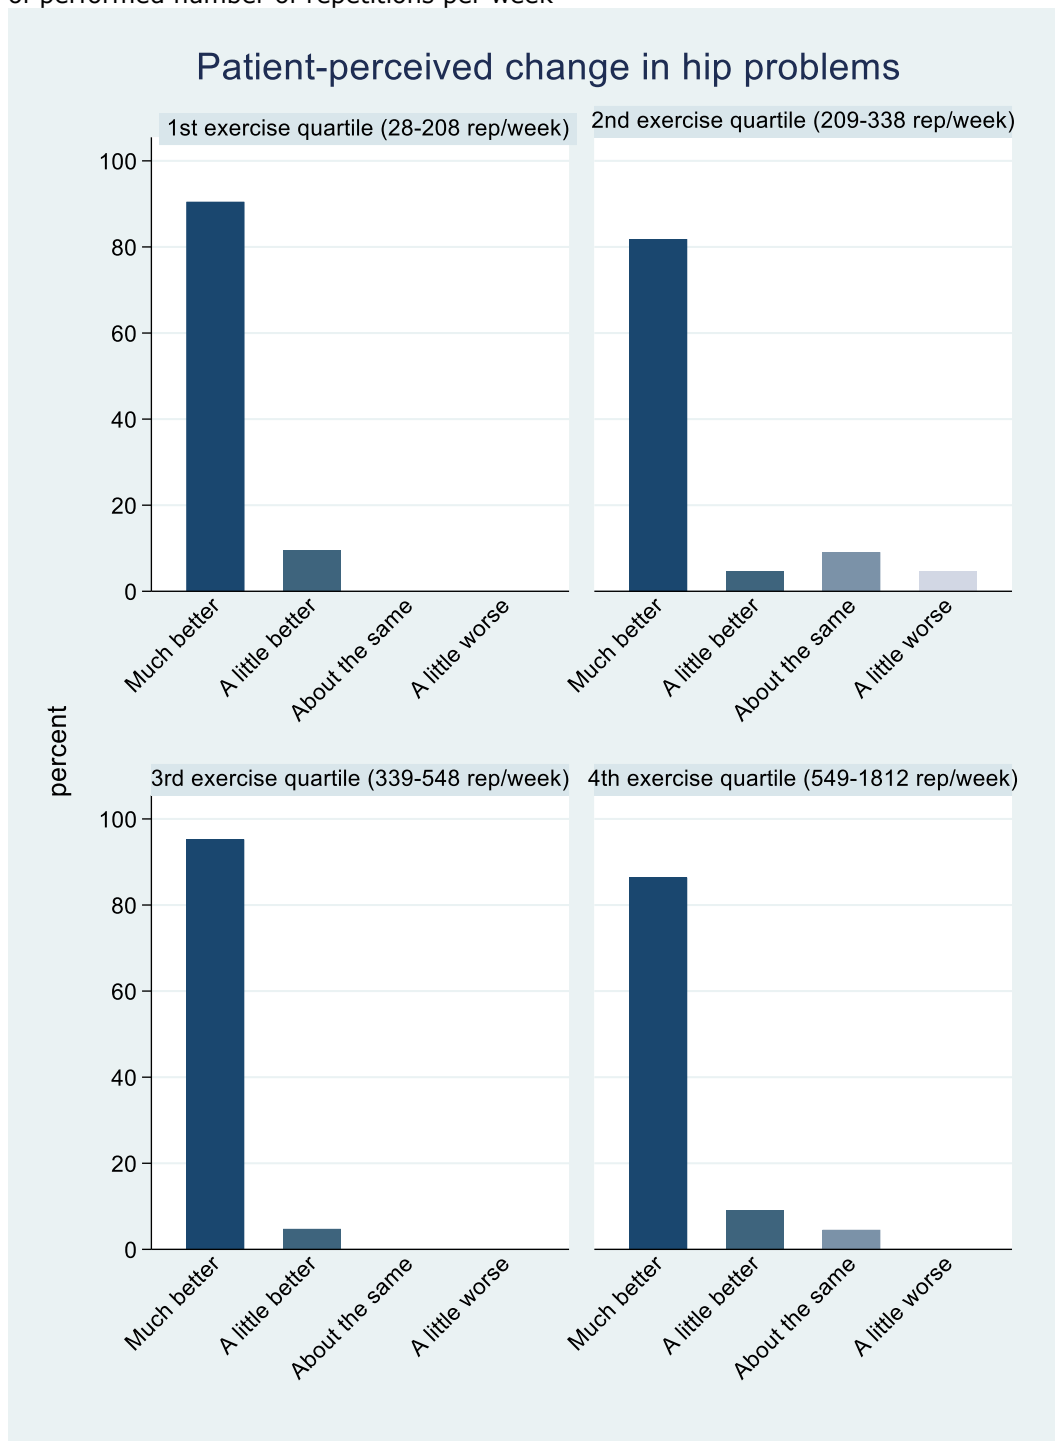

**MCII**

Due to only 6 observations reporting change in hip symptoms to be "a little better", the estimate of MCII was very imprecise. Results can be seen in tableC4.



## Appendix C – Supplementary results on secondary and exploratory analyses

Appendix to: *Hip strengthening exercise dosage is not associated with clinical improvements after total hip arthroplasty – a prospective cohort study (the PHETHAS-1 study)*

### Patient-perceived result of surgery

**Table C6.** Change from baseline to 10-week follow-up in gait speed, HOOS\_adl, HOOS\_symp, HOOS\_pain and HOOS\_qol, distributed on level of patient-perceived result of surgery

|                        | <b>Change in HOOS_adl</b><br>mean<br>(95% CI) | <b>Change in HOOS_pain</b><br>mean<br>(95% CI) | <b>Change in HOOS_symp</b><br>mean<br>(95% CI) | <b>Change in HOOS_qol</b><br>mean<br>(95% CI) | <b>Change in gait speed</b><br>(m/sec)<br>median<br>[1st-3rd quartile] |
|------------------------|-----------------------------------------------|------------------------------------------------|------------------------------------------------|-----------------------------------------------|------------------------------------------------------------------------|
| <b>Excellent</b>       | n=56<br>14 (11; 18)                           | n=57<br>14 (11; 18)                            | n=57<br>13 (10; 16)                            | n=57<br>22 (17; 27)                           | n=58<br>0.32 [0.20-0.43]                                               |
| <b>Very good</b>       | n=23<br>13 (8; 17)                            | n=23<br>13 (8; 18)                             | n=23<br>15 (10; 20)                            | n=23<br>20 (11; 30)                           | n=23<br>0.34 [0.27-0.40]                                               |
| <b>Good</b>            | n=4<br>22 (7; 37)                             | n=4<br>17 (-7; 41)                             | n=4<br>15 (-13; 43)                            | n=4<br>22 (9; 35)                             | n=4<br>0.34 [0.25-0.40]                                                |
| <b>Fair</b>            | n=2<br>[6-10]*                                | n=2<br>[-10-12]*                               | n=2<br>[-25-10]*                               | n=2<br>[0-12]*                                | n=2<br>[0.25-0.36]*                                                    |
| <b>Poor</b>            | n=2<br>[-10-18]*                              | n=2<br>[-17-10]*                               | n=2<br>[-30-5]*                                | n=2<br>[-25-0]*                               | n=2<br>[0.16-0.21]*                                                    |
| <b>Acceptable†</b>     | n=83<br>14 (11; 17)                           | n=84<br>14 (11;17)                             | n=84<br>14 (11;16)                             | n=83<br>21 (17; 25)                           | 85<br>0.33 [0.21-0.42]                                                 |
| <b>Not acceptable‡</b> | n=4<br>6 (-13; 25)                            | n=4<br>-1 (-24; 22)                            | n=4<br>-10 (-42; 22)                           | n=4<br>-3 (-28; 22)                           | 4<br>0.23 [0.18-0.31]                                                  |

\* Range

† Comprises participants reporting an excellent, very good or good result of the operation

‡ Comprises participants reporting a fair or poor result of the operation

### PASS

**Table C7.** Mean and median scores for HOOS subscales at 10 week follow-up for participants reporting a good, very good or excellent result of the operation.

|                            | <b>Mean (95% CI)</b> | <b>Median [1st-3rd quartile]</b> |
|----------------------------|----------------------|----------------------------------|
| <b>HOOS_adl, n=84</b>      | 89 (87; 91)          | 91 [87.5-95.5]                   |
| <b>HOOS_symptoms, n=85</b> | 84 (81; 86)          | 85 [75-90]                       |
| <b>HOOS_pain, n=85</b>     | 90 (88; 93)          | 93 [85-98]                       |
| <b>HOOS_qol, n=84</b>      | 78 (74; 81)          | 75 [69-100]                      |
